# Supplementary material for: ‘Template-free’ synthesis of self-assembled micro-spikes resulting in ‘sea-urchin’-like carbon structures for suppressing electromagnetic radiation
Source: Royal Society of Chemistry journal article supplement (doi:10.1039/d2ma00715k), 2022-01-01
Supplement: d2ma00715k1.pdf [file d2ma00715k1.pdf]

## **‘Template-free’ synthesis of self-assembled micro-spikes resulting in ‘sea-urchin’ like carbon structures suppress electromagnetic radiation**

Vidyashree M.P.<sup>a</sup>, Kumari Sushmita<sup>b,c</sup>, Kokila M.K.<sup>a\*</sup>, Suryasarathi Bose<sup>b\*</sup>

<sup>a</sup> Department of Physics, Bangalore University, Bangalore -560056, Karnataka, India

<sup>b</sup> Department of Materials Engineering, Indian Institute of Science Bangalore-560012, Karnataka, India

<sup>c</sup> Centre for Nano Science and Engineering, Indian Institute of Science, Bengaluru-560012, India

**\*Corresponding author:** [sbose@iisc.ac.in](mailto:sbose@iisc.ac.in) (SB); [drmkkokila@gmail.com](mailto:drmkkokila@gmail.com) (KMK)

### **Supplementary information**

#### **1. Bulk electrical conductivity of epoxy and epoxy/carbon nanotube (CNT) composites**

Figure S1 shows the AC electrical conductivity of epoxy composites with 0.5 wt% CNT and 1 wt% CNT. For comparison with the epoxy/urchin-based composites, these control samples were prepared. From the plot, we observe that the dc electrical conductivity of composites with 0.5 wt% CNT and 1 wt% CNT is less compared to that of composites with C-urchins. This is mainly due to the poor dispersion of CNTs, hindering the connectivity in case of CNT-based epoxy composites. Also compared to C-urchins, high loading of CNTs remain challenge in the case of epoxy/CNT composites because of the sudden increase in the viscosity leading to the processing difficulties.

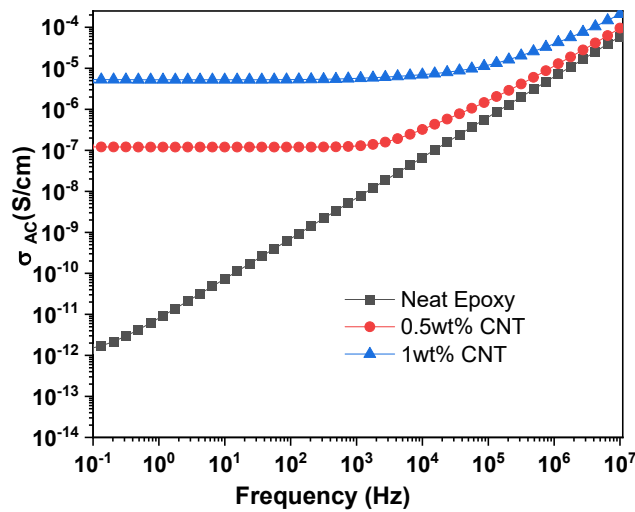

**Figure S1:** AC electrical conductivity of neat epoxy and epoxy/CNT composites

## 2. EMI shielding effectiveness ( $SE_T$ ) of composites with 0.5 wt% CNT and 1 wt% CNT

Figure S2 shows the  $SE_T$  of epoxy composites with 0.5 wt% CNT and 1 wt% CNT (for 1 mm thickness, K band). For comparison with the epoxy/urchin-based composites, these control samples were prepared. From the plot, it can be observed that the  $SE_T$  of composite with 0.5 wt% CNT and 1 wt% CNT are -9 dB and -12 dB, respectively. In contrast, the epoxy composite containing urchins (7wt%) result in enhanced electromagnetic shielding performance. As already mentioned, increasing the content of CNT (above 1 wt%) in epoxy is a challenge. Also, the poor dispersion of CNTs in epoxy results in a lower  $SE_T$  value than urchin/epoxy composites.

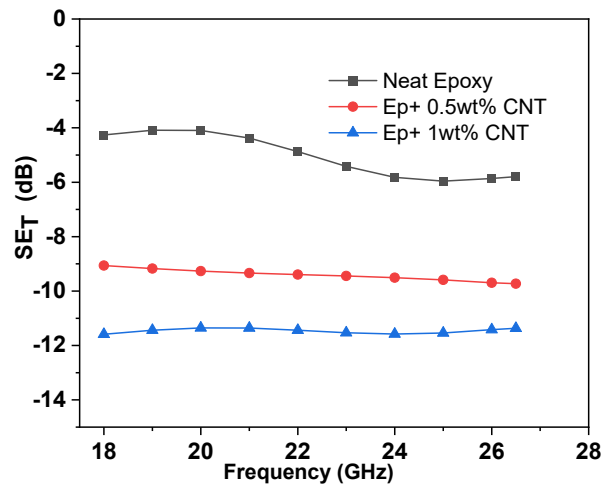

**Figure S2** :  $SE_T$  vs. frequency plot of neat epoxy and epoxy/CNT composites
